# Supplementary material for: The Imprint of Droughts on Mediterranean Pine Forests
Source: MDPI journal article supplement (doi:10.3390/f13091396), 2022-08-31

SUPPLEMENTARY MATERIALS

Table S1 a: Precipitation correlation values for Pinus halepensis

| MEAN PCP<br>MONTH | LAG |       |       |       |       |       |       |       |       |       |       |       |       |       |       |       |       |       |       |       |       |       |       |    |
|-------------------|-----|-------|-------|-------|-------|-------|-------|-------|-------|-------|-------|-------|-------|-------|-------|-------|-------|-------|-------|-------|-------|-------|-------|----|
|                   | 1   | 2     | 3     | 4     | 5     | 6     | 7     | 8     | 9     | 10    | 11    | 12    | 13    | 14    | 15    | 16    | 17    | 18    | 19    | 20    | 21    | 22    | 23    | 24 |
| 1                 |     |       |       |       | 0,34  | 0,31  | 0,21  | 0,30  |       |       |       |       |       |       |       |       |       |       |       |       |       |       |       |    |
| 2                 |     |       |       |       |       | 0,35  | 0,31  | 0,21  | 0,30  |       |       |       |       |       |       |       |       |       |       |       |       |       |       |    |
| 3                 |     |       |       |       |       |       | 0,32  | 0,27  | 0,18  | 0,31  |       |       |       |       |       |       |       |       |       |       |       |       |       |    |
| 4                 |     |       |       |       |       |       |       | 0,22  |       |       | 0,29  |       |       |       |       |       |       |       |       |       |       |       |       |    |
| 5                 |     | -0,17 | -0,19 |       |       |       |       |       |       |       |       | 0,17  |       |       |       |       |       |       |       |       |       |       |       |    |
| 6                 |     | -0,22 | -0,21 | -0,24 | -0,21 | -0,22 |       |       |       |       |       |       |       |       |       |       |       |       |       |       |       |       |       |    |
| 7                 |     | -0,54 | -0,51 | -0,45 | -0,45 | -0,41 | -0,42 | -0,34 | -0,34 | -0,31 | -0,25 | -0,21 | -0,22 | -0,20 |       |       |       |       |       |       |       |       |       |    |
| 8                 |     |       | -0,44 | -0,54 | -0,49 | -0,48 | -0,45 | -0,44 | -0,36 | -0,35 | -0,33 | -0,28 | -0,26 | -0,26 | -0,25 |       |       |       |       |       |       |       |       |    |
| 9                 |     |       |       | -0,41 | -0,50 | -0,49 | -0,48 | -0,44 | -0,41 | -0,35 | -0,33 | -0,32 | -0,31 | -0,28 | -0,30 | -0,28 | -0,17 |       | -0,17 |       |       |       |       |    |
| 10                |     |       |       |       | -0,27 | -0,43 | -0,47 | -0,48 | -0,44 | -0,41 | -0,36 | -0,35 | -0,36 | -0,34 | -0,30 | -0,32 | -0,29 | -0,19 | -0,18 | -0,17 | -0,16 |       |       |    |
| 11                |     |       |       |       |       | -0,25 | -0,40 | -0,45 | -0,46 | -0,42 | -0,39 | -0,35 | -0,34 | -0,34 | -0,32 | -0,28 | -0,30 | -0,27 | -0,17 | -0,18 | -0,18 | -0,17 | -0,17 |    |
| 12                |     |       |       |       |       |       | -0,25 | -0,39 | -0,44 | -0,44 | -0,40 | -0,37 | -0,33 | -0,32 | -0,32 | -0,31 | -0,27 | -0,29 | -0,26 | -0,17 | -0,17 | -0,17 | -0,17 |    |

Table S2: Mean temperature correlation values for Pinus halepensis

| MEAN TMEAN<br>MONTH | LAG  |      |      |      |       |       |       |       |       |       |       |       |       |       |       |       |       |       |       |       |       |      |    |    |
|---------------------|------|------|------|------|-------|-------|-------|-------|-------|-------|-------|-------|-------|-------|-------|-------|-------|-------|-------|-------|-------|------|----|----|
|                     | 1    | 2    | 3    | 4    | 5     | 6     | 7     | 8     | 9     | 10    | 11    | 12    | 13    | 14    | 15    | 16    | 17    | 18    | 19    | 20    | 21    | 22   | 23 | 24 |
| 1                   |      |      |      |      | -0,23 | -0,27 | -0,21 | -0,27 |       | -0,22 | -0,24 | -0,26 | -0,33 | -0,34 | -0,32 | -0,30 |       |       |       |       |       |      |    |    |
| 2                   | 0,35 | 0,35 | 0,26 | 0,26 | 0,15  | -0,18 | -0,20 |       | -0,20 |       |       |       |       | -0,28 | -0,29 | -0,28 | -0,26 |       |       |       |       |      |    |    |
| 3                   |      | 0,28 | 0,35 | 0,34 | 0,37  | 0,27  | -0,13 | -0,16 |       | -0,18 |       |       |       |       | -0,24 | -0,26 | -0,23 |       |       |       |       |      |    |    |
| 4                   |      |      | 0,24 | 0,30 | 0,38  | 0,38  | 0,39  | 0,32  |       |       |       |       |       |       |       | -0,20 | -0,22 |       |       |       |       |      |    |    |
| 5                   |      |      |      | 0,19 | 0,22  | 0,30  | 0,34  | 0,37  | 0,36  | 0,31  |       |       |       |       |       |       |       | -0,18 |       |       |       |      |    |    |
| 6                   |      |      |      |      | 0,13  | 0,16  | 0,24  | 0,29  | 0,31  | 0,29  | 0,28  |       |       |       |       |       |       | -0,17 | -0,19 | -0,17 | -0,16 |      |    |    |
| 7                   |      | 0,18 |      |      | 0,16  | 0,20  | 0,22  | 0,29  | 0,35  | 0,36  | 0,34  | 0,31  |       |       |       |       |       | -0,13 | -0,16 | -0,14 | -0,14 |      |    |    |
| 8                   |      |      |      |      |       | 0,17  | 0,23  | 0,24  | 0,30  | 0,35  | 0,37  | 0,36  | 0,35  | 0,14  |       |       |       |       |       |       |       |      |    |    |
| 9                   |      |      |      |      |       |       | 0,32  | 0,38  | 0,39  | 0,44  | 0,48  | 0,48  | 0,47  | 0,49  | 0,28  | 0,25  | 0,23  | 0,15  | 0,13  |       |       |      |    |    |
| 10                  |      |      |      |      |       |       |       | 0,23  | 0,20  | 0,27  | 0,32  | 0,34  | 0,38  | 0,41  | 0,41  | 0,42  | 0,43  | 0,24  | 0,21  | 0,20  |       |      |    |    |
| 11                  |      |      |      |      |       |       |       |       | 0,23  | 0,20  | 0,27  | 0,33  | 0,35  | 0,40  | 0,42  | 0,43  | 0,43  | 0,45  | 0,26  | 0,22  | 0,20  |      |    |    |
| 12                  |      |      |      |      |       |       |       |       |       | 0,23  | 0,19  | 0,25  | 0,31  | 0,33  | 0,37  | 0,40  | 0,40  | 0,41  | 0,41  | 0,23  | 0,19  | 0,18 |    |    |

Table S3: Precipitation and mean temperature correlation values for Pinus halepensis

| MEAN P_T<br>MONTH | LAG |   |   |   |       |       |       |       |       |       |       |       |       |       |       |       |       |       |       |       |       |       |       |       |
|-------------------|-----|---|---|---|-------|-------|-------|-------|-------|-------|-------|-------|-------|-------|-------|-------|-------|-------|-------|-------|-------|-------|-------|-------|
|                   | 1   | 2 | 3 | 4 | 5     | 6     | 7     | 8     | 9     | 10    | 11    | 12    | 13    | 14    | 15    | 16    | 17    | 18    | 19    | 20    | 21    | 22    | 23    | 24    |
| 1                 |     |   |   |   | -0,17 | -0,34 | -0,30 | -0,20 | -0,31 | -0,23 | -0,24 | -0,26 | -0,26 | -0,30 | -0,29 | -0,30 | -0,34 | -0,23 |       | -0,22 | -0,23 | -0,25 | -0,24 |       |
| 2                 |     |   |   |   |       | -0,16 | -0,39 | -0,34 | -0,22 | -0,33 | -0,25 | -0,26 | -0,28 | -0,27 | -0,32 | -0,30 | -0,31 | -0,35 | -0,23 |       | -0,23 | -0,25 | -0,26 | -0,25 |
| 3                 |     |   |   |   |       |       | -0,40 | -0,35 | -0,25 | -0,36 | -0,26 | -0,28 | -0,29 | -0,28 | -0,33 | -0,31 | -0,31 | -0,35 | -0,23 |       | -0,23 | -0,25 | -0,26 |       |
| 4                 |     |   |   |   |       |       |       | -0,33 | -0,29 | -0,21 | -0,34 | -0,26 | -0,27 | -0,28 | -0,28 | -0,32 | -0,30 | -0,30 | -0,33 | -0,22 |       | -0,22 | -0,24 |       |
| 5                 |     |   |   |   |       |       |       |       | -0,19 | -0,17 |       | -0,25 | -0,19 | -0,20 | -0,22 | -0,21 | -0,24 | -0,24 | -0,27 |       |       |       |       |       |
| 6                 |     |   |   |   |       |       |       |       |       |       |       |       | -0,15 |       | -0,13 | -0,16 | -0,15 | -0,18 | -0,19 | -0,19 | -0,21 |       |       |       |
| 7                 |     |   |   |   |       |       |       |       |       |       |       |       |       |       |       |       |       |       |       |       |       | -0,14 |       |       |
| 8                 |     |   |   |   |       |       |       |       |       |       |       |       |       |       |       |       |       |       |       |       |       |       |       |       |
| 9                 |     |   |   |   |       |       |       |       |       |       |       |       |       |       |       |       |       |       |       |       |       |       |       |       |
| 10                |     |   |   |   |       |       |       |       |       |       |       |       |       |       |       |       |       |       |       |       |       |       |       |       |
| 11                |     |   |   |   |       |       |       |       |       |       |       |       |       |       |       |       |       |       |       |       |       |       |       |       |
| 12                |     |   |   |   |       |       |       |       |       |       |       |       |       |       |       |       |       |       |       |       |       |       |       |       |

Table S4: Precipitation correlation values for Pinus sylvestris

| Mean PCP<br>MONTH | LAG |       |       |       |       |       |       |       |       |       |       |       |       |       |       |       |       |       |       |       |       |       |       |       |
|-------------------|-----|-------|-------|-------|-------|-------|-------|-------|-------|-------|-------|-------|-------|-------|-------|-------|-------|-------|-------|-------|-------|-------|-------|-------|
|                   | 1   | 2     | 3     | 4     | 5     | 6     | 7     | 8     | 9     | 10    | 11    | 12    | 13    | 14    | 15    | 16    | 17    | 18    | 19    | 20    | 21    | 22    | 23    | 24    |
| 1                 |     | -0,22 | -0,25 | -0,22 |       |       |       | -0,19 | -0,21 | -0,23 | -0,23 | -0,21 | -0,23 | -0,21 | -0,27 | -0,30 | -0,29 | -0,28 | -0,26 | -0,25 | -0,24 | -0,24 | -0,24 | -0,24 |
| 2                 |     |       | -0,18 | -0,23 | -0,28 | -0,24 |       | -0,20 | -0,23 | -0,26 | -0,27 | -0,28 | -0,25 | -0,27 | -0,24 | -0,30 | -0,32 | -0,32 | -0,31 | -0,29 | -0,28 | -0,27 | -0,27 | -0,27 |
| 3                 |     |       |       | -0,21 | -0,20 |       |       | -0,22 | -0,23 | -0,23 | -0,27 | -0,28 | -0,28 | -0,26 | -0,27 | -0,25 | -0,29 | -0,32 | -0,31 | -0,30 | -0,28 | -0,28 | -0,27 | -0,26 |
| 4                 |     |       |       |       | -0,20 | -0,25 | -0,22 |       | -0,22 | -0,25 | -0,25 | -0,24 | -0,27 | -0,29 | -0,29 | -0,27 | -0,28 | -0,26 | -0,30 | -0,33 | -0,32 | -0,31 | -0,29 | -0,28 |
| 5                 |     |       |       |       |       | -0,20 | -0,24 | -0,21 |       | -0,22 | -0,24 | -0,24 | -0,23 | -0,26 | -0,27 | -0,28 | -0,25 | -0,27 | -0,25 | -0,29 | -0,32 | -0,32 | -0,30 | -0,29 |
| 6                 |     |       |       |       |       |       | -0,19 | -0,23 | -0,27 | -0,25 |       | -0,25 | -0,27 | -0,25 | -0,24 | -0,27 | -0,28 | -0,29 | -0,27 | -0,28 | -0,26 | -0,30 | -0,33 | -0,32 |
| 7                 |     |       |       |       |       |       |       | -0,22 | -0,26 | -0,30 | -0,28 | -0,22 | -0,26 | -0,29 | -0,27 | -0,26 | -0,29 | -0,30 | -0,28 | -0,29 | -0,27 | -0,32 | -0,35 | -0,34 |
| 8                 |     |       |       |       |       |       |       |       | -0,24 | -0,27 | -0,24 |       | -0,22 | -0,24 | -0,23 | -0,23 | -0,26 | -0,27 | -0,28 | -0,25 | -0,27 | -0,25 | -0,30 | -0,33 |
| 9                 |     |       |       |       |       |       |       |       |       | -0,21 | -0,25 | -0,27 | -0,25 | -0,20 | -0,23 | -0,25 | -0,24 | -0,25 | -0,27 | -0,28 | -0,29 | -0,27 | -0,28 | -0,26 |
| 10                |     |       |       |       |       |       |       |       |       |       | -0,23 | -0,25 | -0,24 | -0,19 | -0,22 | -0,24 | -0,23 | -0,24 | -0,26 | -0,27 | -0,28 | -0,26 | -0,27 | -0,25 |
| 11                |     |       |       |       |       |       |       |       |       |       |       | -0,22 | -0,24 | -0,23 | -0,19 | -0,23 | -0,24 | -0,23 | -0,24 | -0,27 | -0,27 | -0,28 | -0,26 | -0,27 |
| 12                |     |       |       |       |       |       |       |       |       |       |       |       | -0,22 | -0,24 | -0,22 | -0,19 | -0,22 | -0,23 | -0,23 | -0,23 | -0,26 | -0,27 | -0,27 | -0,25 |

Table S5: Mean temperature correlation values for *Pinus uncinata*

[illegible]

Figure S6: Intensity behavior as a function of mean annual temperature and annual precipitation.

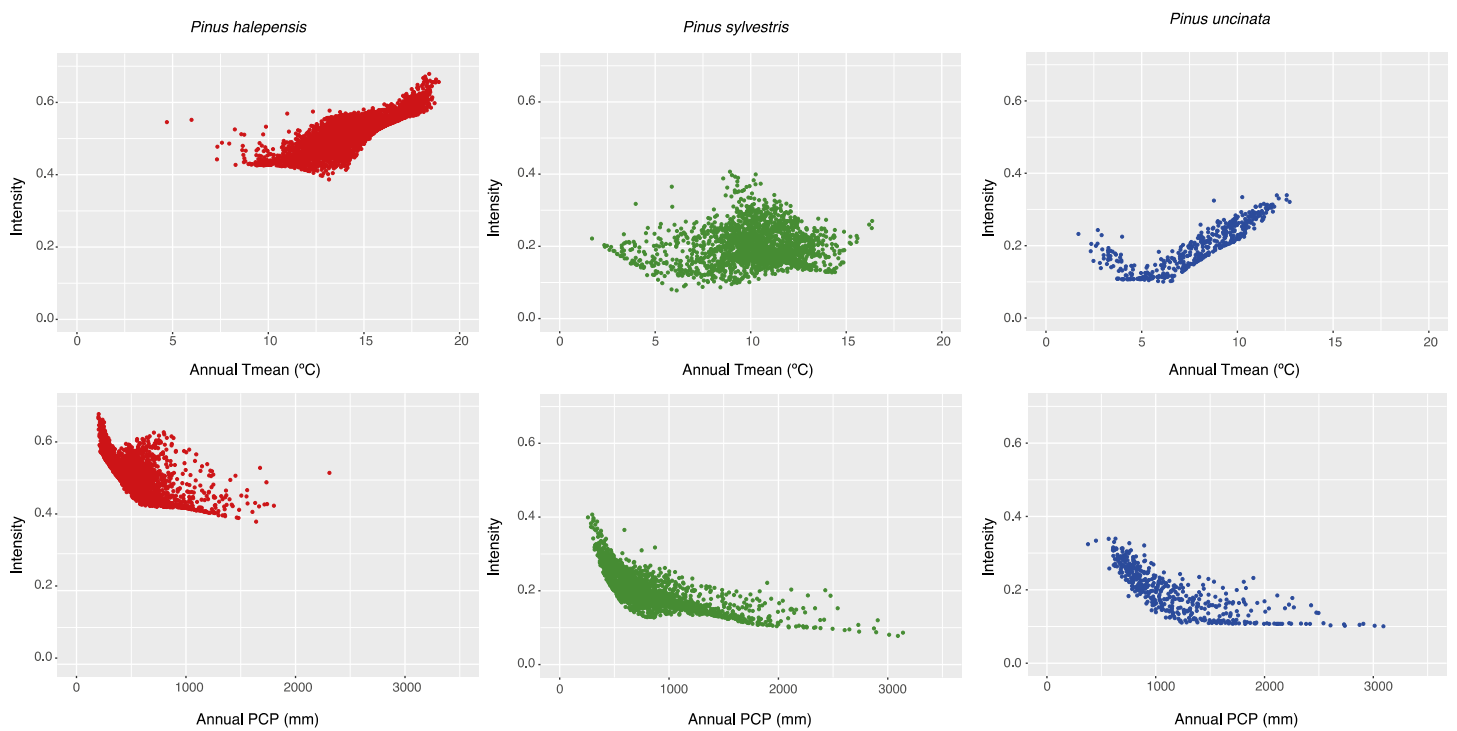

Figure S7: Duration behavior as a function of mean annual temperature and annual precipitation.

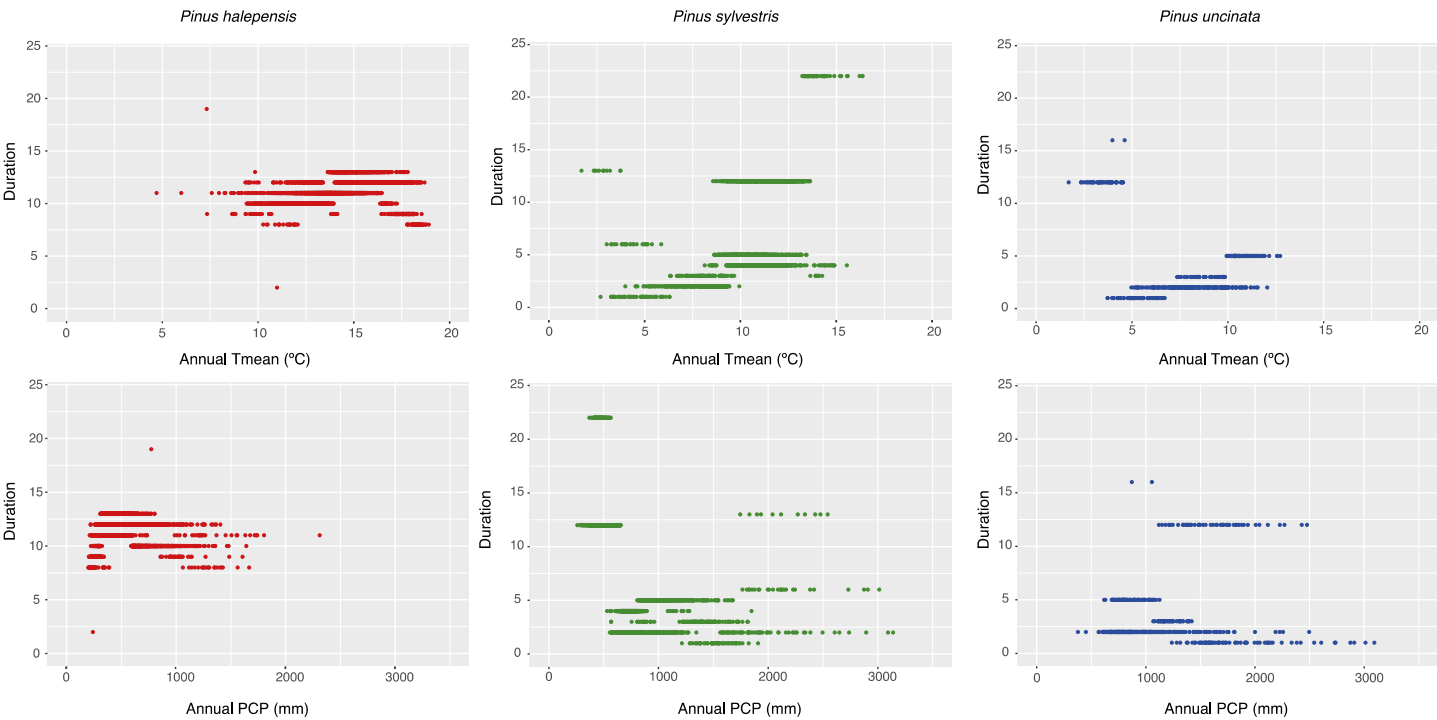

Figure S8: Seasonality behavior as a function of mean annual temperature and annual precipitation.

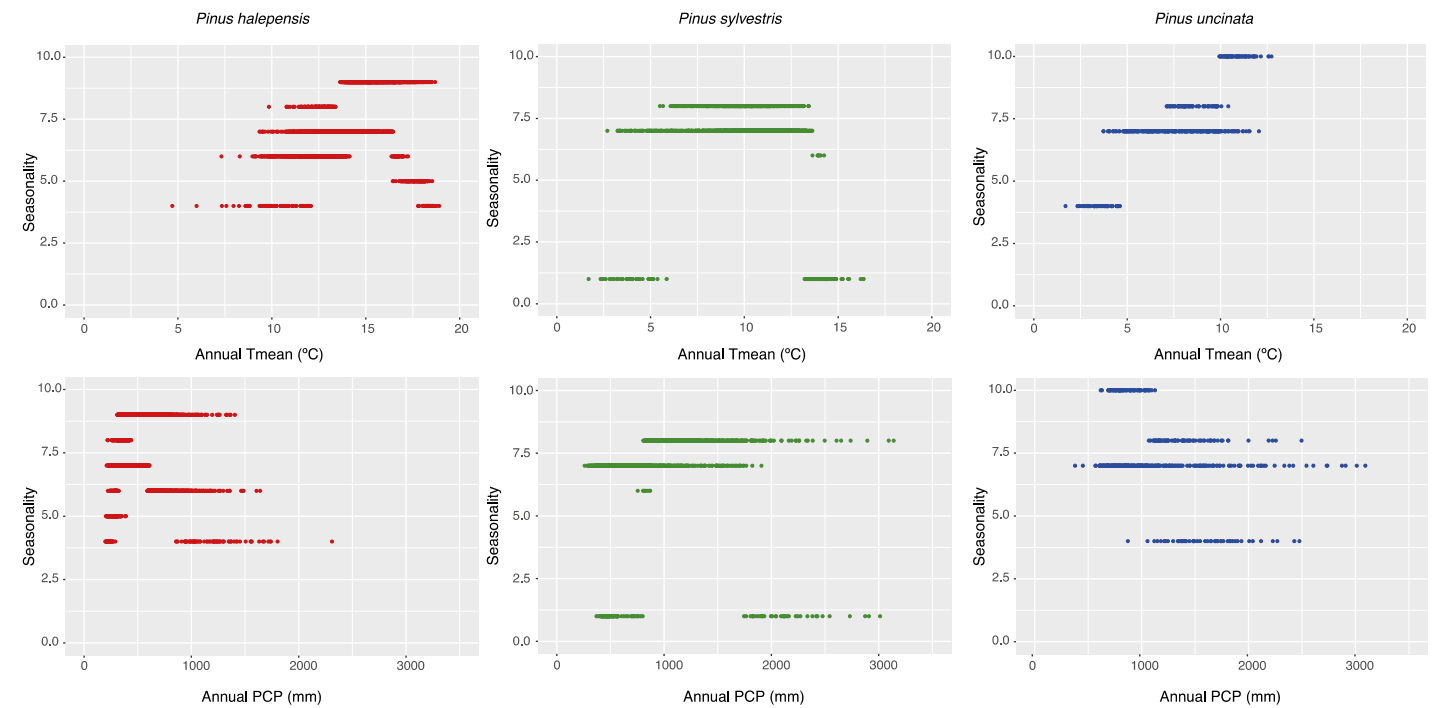

Supplement: s1 [file s1]
